# Supplementary material for: The Impact on Healthcare Service Quality and Patients Satisfaction via Adopting Mobile Health Technology：an Empirical Study in a Public Ophthalmologic Hospital in China
Source: Research Square preprint supplement (doi:10.21203/rs.3.rs-1850727/v1), 2022-07-22
Supplement: Supplementary file 1 [file abc71c1a9b7fab8ece6218bd.docx]

**Appendix 1-Questionnaire**

**Study on Evaluation, Use and Application Result of Mobile Health Apps in Hospitals**

Respected patients:

Thank you for participating in this thesis survey. The data collected in this questionnaire is purely used for the purpose of the research. Our statistical analysis is based on the comprehensive results of all questionnaires, and no personal data will be analyzed and stored. Therefore, please answer all your questions based on your own personal experience and real feelings. This questionnaire consists of five parts: 1) Background information, 2) patient opinions and usage of the mobile health Apps, 3) patients' evaluation of the hospital's experience of seeing a doctor after using the mobile health Apps, 4) patient satisfaction with the experience of seeing a doctor, 5) patients' expectations and actual feelings of the hospital's service quality. It takes about 20 minutes to complete the questionnaire. Thank you very much for your support and help in this doctoral dissertation.

In this study, the functions of the mobile health Apps include making appointment, online consultation, and inquiring information through the mobile health Apps (for example, Wechat health client); payment for medical expenses through the mobile health Apps; doctors and patients communicate online through the mobile health Apps; inquiry and understanding of medical information and so on.

Name of hospital: Questionnaire Date:

**Part I: Background information**

Please provide the following background information to help us better understand your medical needs and the specific situation of using Wechat health client:

a.The types of ocular disease (please choose one): ametropia; visual fatigue; ocular surface diseases; cataract; glaucoma; fundus diseases; strabismus and amblyopia; trauma

b.What is the purpose of coming to this hospital today? (Please choose one): Initial Re-visit

Accompanied, Other (please note): ______

c.Gender: male; female

d.Age:

e. Your occupation: Government Government-affiliated institutions State-owned Enterprises Private-owned company Foreign Enterprises Private Enterprises Self-employed Households Farmers__ Other (please specify): __________

f. Highest Education: _ Doctor _ Master _ Bachelor _ Diploma _ Vocational Technical School _ High School Junior Middle School Primary School

g. What mobile software do you use to see a doctor: Wechat Health Client; Health 160; Others (please specify):_____

h. When do you first start using Wechat (e.g. 2015): ________________

i. The average time you use Wechat every day is about ________________mins

j. Which year did you first use the Wechat Health Client: ________________

k. Which year was your first visit to this hospital: __________________

l. How many times have you visited this hospital in the last three years? Times

m. In the total number of visits you filled out in the previous question, how many times have you applied Wechat Health Client to do the following things?

(1) Making appointment times

(2) Payment times

(3) Inquiry for laboratory reports and medical records times

(4) Consulting doctors times

(5) Inquiry and understanding of medical information (such as health education information, vaccine information, doctor's profile, etc.) times

Note: If no mobile health apps is used, stop answering questions. If you use the Wechat Apps, and answer all questions based on the Wechat Health Client. If you use Health 160 or other similar software, answer all questions based on Health 160 or other similar software.

**Part II: Patient's Views and Use of Wechat Health Client**

Please circle "O" and choose a number to indicate your agreement with each of the following statements (1 for disagreement, 7 for agreement). There are no objective answers or criteria for scoring. Please judge and estimate according to your experience, feelings and observations. Please answer all the questions.

2. I am going to the hospital to see a doctor now, basically using the Wechat Health Client...

|  | Make an appointment for doctor | 1 | 2 | 3 | 4 | 5 | 6 | 7 |
| --- | --- | --- | --- | --- | --- | --- | --- | --- |
|  | Pay for medical related expenses | 1 | 2 | 3 | 4 | 5 | 6 | 7 |
|  | Check laboratory reports and medical records | 1 | 2 | 3 | 4 | 5 | 6 | 7 |
|  | Interact with the doctor you want to consult online at any time | 1 | 2 | 3 | 4 | 5 | 6 | 7 |
|  | Communicate with other patients | 1 | 2 | 3 | 4 | 5 | 6 | 7 |
|  | Ask medical staff questions via SMS | 1 | 2 | 3 | 4 | 5 | 6 | 7 |
|  | Learn about health education information and medical information pushed by hospitals | 1 | 2 | 3 | 4 | 5 | 6 | 7 |

**Part III: Evaluation of patients experience of seeing a doctor after using Wechat Health Client**

3 Since the hospital started the Wechat Health Client, it has changed the experience of my experience compared with before.

|  | Now I can make an appointment to the doctor who I want to see every time | 1 | 2 | 3 | 4 | 5 | 6 | 7 |
| --- | --- | --- | --- | --- | --- | --- | --- | --- |
|  | When I choose a doctor, I can get information about the doctor's background and experience online | 1 | 2 | 3 | 4 | 5 | 6 | 7 |
|  | When I choose a doctor, I can see other patients’ scores and assessments on the Internet | 1 | 2 | 3 | 4 | 5 | 6 | 7 |
|  | After seeing the doctors, I can rate the doctor online. | 1 | 2 | 3 | 4 | 5 | 6 | 7 |
|  | Now I can manage and treat my disease more effectively | 1 | 2 | 3 | 4 | 5 | 6 | 7 |
|  | Now I can keep in touch with other patients online | 1 | 2 | 3 | 4 | 5 | 6 | 7 |
|  | I can now ask the medical staff questions via SMS on the Internet | 1 | 2 | 3 | 4 | 5 | 6 | 7 |
|  | Every link in my medical treatment process is now more coherent | 1 | 2 | 3 | 4 | 5 | 6 | 7 |
|  | I am maintaining a continuous communication relationship with my doctor | 1 | 2 | 3 | 4 | 5 | 6 | 7 |
|  | Now the queue has been reduced in every link of my medical treatment | 1 | 2 | 3 | 4 | 5 | 6 | 7 |
|  | I took the initiative to participate in discussions with doctors about treatment options | 1 | 2 | 3 | 4 | 5 | 6 | 7 |
|  | I actively seek other information related to my health | 1 | 2 | 3 | 4 | 5 | 6 | 7 |
|  | I take the initiative to participate in learning preventive treatment information | 1 | 2 | 3 | 4 | 5 | 6 | 7 |
|  | After I see a doctor, I will take the initiative to follow up and complete all the required treatments | 1 | 2 | 3 | 4 | 5 | 6 | 7 |
|  | I took the initiative to help the doctor determine my health and problems | 1 | 2 | 3 | 4 | 5 | 6 | 7 |
|  | The medical staff in the hospital now know the records of every link of my visit very well | 1 | 2 | 3 | 4 | 5 | 6 | 7 |
|  | In every aspect of my medical treatment process, the data related to me can be checked in time | 1 | 2 | 3 | 4 | 5 | 6 | 7 |
|  | In every aspect of my medical treatment, medical staff are now in harmony with each other | 1 | 2 | 3 | 4 | 5 | 6 | 7 |
|  | It's easy for me and the medical staff to make a common agreement now | 1 | 2 | 3 | 4 | 5 | 6 | 7 |
|  | I can easily access and store my medical information now | 1 | 2 | 3 | 4 | 5 | 6 | 7 |
|  | I can now access and process my medical information anytime and anywhere | 1 | 2 | 3 | 4 | 5 | 6 | 7 |
|  | Now, when I am in the hospital, the medical staff in different departments are well coordinated with each other | 1 | 2 | 3 | 4 | 5 | 6 | 7 |
|  | Now even if I am looking for a different doctor in the hospital, the process of diagnosis and treatment is consistently standardized | 1 | 2 | 3 | 4 | 5 | 6 | 7 |
|  | I can now check the medical records of the past at each stage of the hospital | 1 | 2 | 3 | 4 | 5 | 6 | 7 |
|  | Now if the medical staff I'm looking for is not there, other medical staff can meet my needs | 1 | 2 | 3 | 4 | 5 | 6 | 7 |
|  | Now the doctor can give me the most suitable treatment according to my personal condition and complete historical information | 1 | 2 | 3 | 4 | 5 | 6 | 7 |
|  | Now my doctor's treatment plan is consistent with my changing needs and conditions | 1 | 2 | 3 | 4 | 5 | 6 | 7 |
|  | Now that I'm in the hospital, I know exactly who I'm looking for at every step | 1 | 2 | 3 | 4 | 5 | 6 | 7 |
|  | The doctor encouraged me to ask questions | 1 | 2 | 3 | 4 | 5 | 6 | 7 |
|  | The doctor will answer my questions adequately | 1 | 2 | 3 | 4 | 5 | 6 | 7 |
|  | The doctor actively encouraged me to participate in discussions with the doctor about treatment options | 1 | 2 | 3 | 4 | 5 | 6 | 7 |
|  | Doctors offer other information about my condition and treatment on their own initiative | 1 | 2 | 3 | 4 | 5 | 6 | 7 |
|  | Doctors actively provide information on preventive treatment | 1 | 2 | 3 | 4 | 5 | 6 | 7 |
|  | I can understand the explanation given by the doctor | 1 | 2 | 3 | 4 | 5 | 6 | 7 |
|  | The doctor was very considerate of me | 1 | 2 | 3 | 4 | 5 | 6 | 7 |
|  | The doctor made me feel at ease discussing my condition | 1 | 2 | 3 | 4 | 5 | 6 | 7 |
|  | I feel that the doctor knows my medical history very well | 1 | 2 | 3 | 4 | 5 | 6 | 7 |
|  | I feel that doctors know very well about my health care needs | 1 | 2 | 3 | 4 | 5 | 6 | 7 |

**Part IV: Patient satisfaction**

|  | I am satisfied with the medical services I received during my stay in this hospital | 1 | 2 | 3 | 4 | 5 | 6 | 7 |
| --- | --- | --- | --- | --- | --- | --- | --- | --- |
|  | I'm very satisfied with the doctor's attitude | 1 | 2 | 3 | 4 | 5 | 6 | 7 |
|  | I am very satisfied with the quality of the doctor's treatment | 1 | 2 | 3 | 4 | 5 | 6 | 7 |
|  | My illness has been properly treated | 1 | 2 | 3 | 4 | 5 | 6 | 7 |
|  | After seeing the doctor, I have a better understanding of my condition | 1 | 2 | 3 | 4 | 5 | 6 | 7 |
|  | After talking with the doctor, I feel a lot better about my condition | 1 | 2 | 3 | 4 | 5 | 6 | 7 |
|  | The doctor's choice of treatment is the most appropriate for me | 1 | 2 | 3 | 4 | 5 | 6 | 7 |
|  | My condition will be completely improved | 1 | 2 | 3 | 4 | 5 | 6 | 7 |
|  | I'm satisfied with the doctor's consultation time | 1 | 2 | 3 | 4 | 5 | 6 | 7 |
|  | I am satisfied with the waiting time in the hospital | 1 | 2 | 3 | 4 | 5 | 6 | 7 |
|  | I'm satisfied with the total time spent on this visit | 1 | 2 | 3 | 4 | 5 | 6 | 7 |
|  | I'm very clear about how to recover when I get home | 1 | 2 | 3 | 4 | 5 | 6 | 7 |
|  | I am very clear about how to use the medicine | 1 | 2 | 3 | 4 | 5 | 6 | 7 |
|  | I know exactly when to see the doctor next time. | 1 | 2 | 3 | 4 | 5 | 6 | 7 |

**Part V: Expectations and actual feelings of patients on hospital service quality**

For each of the following statements, please circle "O" and make two choices: the first one represents your expectations before coming to the hospital, and the second one represents your actual experience after going to the hospital.

|  |  | expectation | performance |
| --- | --- | --- | --- |
|  | The hospital is clean | 1 2 3 4 5 6 7 | 1 2 3 4 5 6 7 |
|  | The hospital's medical equipment is very advanced | 1 2 3 4 5 6 7 | 1 2 3 4 5 6 7 |
|  | Doctors and nurses dress professionally and neatly | 1 2 3 4 5 6 7 | 1 2 3 4 5 6 7 |
|  | The signs of hospital facilities are very clear | 1 2 3 4 5 6 7 | 1 2 3 4 5 6 7 |
|  | The TV screen in the waiting area shows useful information for the patient | 1 2 3 4 5 6 7 | 1 2 3 4 5 6 7 |
|  | In many places in the hospital, you can see promotional materials that guide how to use the hospital WeChat application | 1 2 3 4 5 6 7 | 1 2 3 4 5 6 7 |
|  | My doctor is very concerned about my personal situation | 1 2 3 4 5 6 7 | 1 2 3 4 5 6 7 |
|  | My doctor is based on my special condition | 1 2 3 4 5 6 7 | 1 2 3 4 5 6 7 |
|  | My doctor understands my specific needs | 1 2 3 4 5 6 7 | 1 2 3 4 5 6 7 |
|  | My doctor is concerned about my unique needs | 1 2 3 4 5 6 7 | 1 2 3 4 5 6 7 |
|  | My doctor showed great sympathy for my condition | 1 2 3 4 5 6 7 | 1 2 3 4 5 6 7 |
|  | My doctor has the ability to treat me well | 1 2 3 4 5 6 7 | 1 2 3 4 5 6 7 |
|  | When the doctor came to see me, I felt safe | 1 2 3 4 5 6 7 | 1 2 3 4 5 6 7 |
|  | The way and behavior of my doctor give me great confidence | 1 2 3 4 5 6 7 | 1 2 3 4 5 6 7 |
|  | My doctor has good medical knowledge | 1 2 3 4 5 6 7 | 1 2 3 4 5 6 7 |
|  | My doctor is trustworthy | 1 2 3 4 5 6 7 | 1 2 3 4 5 6 7 |
|  | My doctor is very experienced | 1 2 3 4 5 6 7 | 1 2 3 4 5 6 7 |
|  | I can easily make an appointment with the doctor I want to see | 1 2 3 4 5 6 7 | 1 2 3 4 5 6 7 |
|  | I can easily make an appointment to the time I want to see a doctor | 1 2 3 4 5 6 7 | 1 2 3 4 5 6 7 |
|  | It's easy for me to find where I need to go in the hospital | 1 2 3 4 5 6 7 | 1 2 3 4 5 6 7 |
|  | I don't have to wait long in hospital | 1 2 3 4 5 6 7 | 1 2 3 4 5 6 7 |
|  | Every step of seeing a doctor in my hospital is very convenient and easy | 1 2 3 4 5 6 7 | 1 2 3 4 5 6 7 |
|  | The hospital staff will always help me whenever I need | 1 2 3 4 5 6 7 | 1 2 3 4 5 6 7 |
|  | My doctor seldom makes mistakes | 1 2 3 4 5 6 7 | 1 2 3 4 5 6 7 |
|  | My doctor always explains the diagnosis and treatment to me very clearly | 1 2 3 4 5 6 7 | 1 2 3 4 5 6 7 |
|  | My medical record in the hospital is always accurate | 1 2 3 4 5 6 7 | 1 2 3 4 5 6 7 |
|  | There are few inconsistencies in my medical records | 1 2 3 4 5 6 7 | 1 2 3 4 5 6 7 |
|  | The service of medical staff is always reliable | 1 2 3 4 5 6 7 | 1 2 3 4 5 6 7 |
|  | My doctor can answer my question quickly | 1 2 3 4 5 6 7 | 1 2 3 4 5 6 7 |
|  | I always get prompt answers when I contact the hospital | 1 2 3 4 5 6 7 | 1 2 3 4 5 6 7 |
|  | Doctors and nurses are not too busy to answer my questions in time | 1 2 3 4 5 6 7 | 1 2 3 4 5 6 7 |
|  | My doctor will keep updated of my condition changes | 1 2 3 4 5 6 7 | 1 2 3 4 5 6 7 |
|  | My doctor will make quick adjustments to my condition | 1 2 3 4 5 6 7 | 1 2 3 4 5 6 7 |

**Thank you very much for your support and help in our research project!**
